# Supplementary material for: Scutellarin acts on the AR-NOX Axis to Remediate Oxidative Stress Injury in a Mouse Model of Cerebral Ischemia/Reperfusion Injury
Source: Research Square preprint supplement (doi:10.21203/rs.3.rs-471790/v1), 2021-05-07
Supplement: Supplementary file 1 [file 6e175421df7be70c84a609f4.xlsx]

## Sheet: BIOLOGICAL_PROCESS
GO.ID	GO.Name	Level	FDR	P.Value	Nr.Test	IDs
GO:0009056	catabolic process	2	0.0271208	1.36753e-06	25	A0A023T778, A0A0A6YW28, E9PWY6, E9PXB0, O35945, O70250, P17439, P35283, P51432, P52760, P61080, Q07417, Q3U7U3, Q6NSQ9, Q6NZR5, Q8CFA2, Q8CI75, Q91VF2, Q91WG7, Q99J83, Q9EQ06, Q9ESP1, Q9JKY7, Q9JLV5, Q9QZF2
GO:1901575	organic substance catabolic process	3	0.03177	3.20392e-06	23	A0A023T778, A0A0A6YW28, E9PWY6, E9PXB0, O35945, O70250, P17439, P35283, P51432, P52760, P61080, Q07417, Q3U7U3, Q6NSQ9, Q6NZR5, Q8CFA2, Q8CI75, Q91VF2, Q91WG7, Q9EQ06, Q9ESP1, Q9JLV5, Q9QZF2
GO:0044248	cellular catabolic process	3	0.0722937	1.09359e-05	22	A0A023T778, A0A0A6YW28, E9PWY6, E9PXB0, O35945, O70250, P17439, P35283, P51432, P61080, Q07417, Q3U7U3, Q6NSQ9, Q6NZR5, Q8CFA2, Q8CI75, Q91VF2, Q91WG7, Q99J83, Q9JKY7, Q9JLV5, Q9QZF2
GO:1900016	negative regulation of cytokine production involved in inflammatory response	8	0.893434	0.000488671	2	H7BX99, P51910
GO:0042135	neurotransmitter catabolic process	5	0.893434	0.000562984	2	Q8CFA2, Q91VF2
GO:1905820	positive regulation of chromosome separation	7	0.893434	0.000642422	2	E9Q7G0, Q9JLV5
GO:0050746	regulation of lipoprotein metabolic process	6	0.893434	0.00091124	2	P17439, P51910
GO:0010508	positive regulation of autophagy	7	0.893434	0.00104607	4	P17439, P35283, Q3U7U3, Q8BRK8
GO:0006469	negative regulation of protein kinase activity	10	0.893434	0.00115712	6	A0A0A6YXS7, B2RUG9, E9Q3X0, P17439, P28653, Q3U7U3
GO:0010638	positive regulation of organelle organization	6	0.893434	0.00121994	10	A0A0N4SW93, D3YZA1, E9PYT3, E9Q7G0, P17439, Q3U7U3, Q4VBD2, Q91VF2, Q99J95, Q9JLV5
GO:0001833	inner cell mass cell proliferation	2	0.893434	0.00122531	2	P70122, Q9ERR1
GO:0010714	positive regulation of collagen metabolic process	5	0.893434	0.00145952	2	H7BX99, Q8BN59
GO:0032965	regulation of collagen biosynthetic process	5	0.893434	0.00145952	2	H7BX99, Q8BN59
GO:0032967	positive regulation of collagen biosynthetic process	6	0.893434	0.00145952	2	H7BX99, Q8BN59
GO:0034427	nuclear-transcribed mRNA catabolic process, exonucleolytic, 3'-5'	11	0.893434	0.00145952	2	Q6NZR5, Q8CI75
GO:0010506	regulation of autophagy	6	0.893434	0.00157401	6	E9PZP8, P17439, P35283, P60853, Q3U7U3, Q8BRK8
GO:0060074	synapse maturation	4	0.893434	0.001584	2	A0A0R4J0Y4, Q4V9Z5
GO:0033673	negative regulation of kinase activity	9	0.893434	0.00163517	6	A0A0A6YXS7, B2RUG9, E9Q3X0, P17439, P28653, Q3U7U3
GO:0060341	regulation of cellular localization	4	0.893434	0.00168989	11	A0A0A6YXS7, A0A0N4SW93, B2RUG9, E9Q7G0, H7BX99, O70493, P51910, Q8R1B5, Q91VF2, Q99J83, Q9ERR1
GO:0042308	negative regulation of protein import into nucleus	9	0.893434	0.00171337	2	A0A0A6YXS7, P51910
GO:1904590	negative regulation of protein import	8	0.893434	0.00171337	2	A0A0A6YXS7, P51910
GO:0032386	regulation of intracellular transport	5	0.893434	0.00185914	7	A0A0A6YXS7, A0A0N4SW93, E9Q7G0, O70493, P51910, Q91VF2, Q9ERR1
GO:0021680	cerebellar Purkinje cell layer development	3	0.893434	0.00198668	2	A0A0R4J0Y4, Q4V9Z5
GO:1901361	organic cyclic compound catabolic process	4	0.893434	0.00200105	8	A0A023T778, O35945, O70250, Q6NSQ9, Q6NZR5, Q8CI75, Q91VF2, Q9EQ06
GO:1902415	regulation of mRNA binding	5	0.893434	0.00227925	2	Q8BN59, Q99J95
GO:1902416	positive regulation of mRNA binding	6	0.893434	0.00227925	2	Q8BN59, Q99J95
GO:0006091	generation of precursor metabolites and energy	3	0.893434	0.00228941	7	A2ASZ8, F8WIK0, O35945, O70250, P00015, Q6NSQ9, Q9CWE0
GO:0008286	insulin receptor signaling pathway	8	0.893434	0.00233019	3	A0A0N4SW93, B2RUG9, Q9ERR1
GO:0002551	mast cell chemotaxis	8	0.893434	0.00234846	1	P05532
GO:0002371	dendritic cell cytokine production	4	0.893434	0.00234846	1	P05532
GO:0034443	negative regulation of lipoprotein oxidation	8	0.893434	0.00234846	1	P51910
GO:0034442	regulation of lipoprotein oxidation	7	0.893434	0.00234846	1	P51910
GO:0042144	vacuole fusion, non-autophagic	6	0.893434	0.00234846	1	Q5KU39
GO:0060587	regulation of lipoprotein lipid oxidation	8	0.893434	0.00234846	1	P51910
GO:0060588	negative regulation of lipoprotein lipid oxidation	9	0.893434	0.00234846	1	P51910
GO:0001695	histamine catabolic process	8	0.893434	0.00234846	1	Q91VF2
GO:0097576	vacuole fusion	5	0.893434	0.00234846	1	Q5KU39
GO:0097326	melanocyte adhesion	5	0.893434	0.00234846	1	P05532
GO:0032762	mast cell cytokine production	5	0.893434	0.00234846	1	P05532
GO:0032387	negative regulation of intracellular transport	6	0.893434	0.00239026	3	A0A0A6YXS7, O70493, P51910
GO:1905216	positive regulation of RNA binding	5	0.893434	0.00243271	2	Q8BN59, Q99J95
GO:0000291	nuclear-transcribed mRNA catabolic process, exonucleolytic	10	0.893434	0.00243271	2	Q6NZR5, Q8CI75
GO:0051348	negative regulation of transferase activity	5	0.900467	0.00249726	6	A0A0A6YXS7, B2RUG9, E9Q3X0, P17439, P28653, Q3U7U3
GO:0045333	cellular respiration	5	0.921991	0.00264009	3	A2ASZ8, P00015, Q9CWE0
GO:1905214	regulation of RNA binding	4	0.921991	0.00275384	2	Q8BN59, Q99J95
GO:0062033	positive regulation of mitotic sister chromatid segregation	9	0.921991	0.00275384	2	E9Q7G0, Q9JLV5
GO:0071901	negative regulation of protein serine/threonine kinase activity	11	0.921991	0.00282545	4	A0A0A6YXS7, B2RUG9, P17439, Q3U7U3
GO:0009894	regulation of catabolic process	4	0.921991	0.00290424	11	B2RUG9, E9PVU9, E9PZP8, O70250, O70493, P17439, P35283, P60853, Q3U7U3, Q8BRK8, Q9D8T7
GO:0010712	regulation of collagen metabolic process	4	0.921991	0.00292148	2	H7BX99, Q8BN59
GO:0014823	response to activity	2	0.921991	0.00292148	2	A2ASZ8, Q8BRK8
GO:0001505	regulation of neurotransmitter levels	3	0.921991	0.00292887	6	A2AIR7, E9PWY6, Q8CFA2, Q8R1B5, Q91VF2, Q91WC9
GO:0031400	negative regulation of protein modification process	8	0.973191	0.00316962	9	A0A0A6YW28, A0A0A6YXS7, B2RUG9, E9Q3X0, P17439, P28653, Q3U7U3, Q99J83, Q9DC33
GO:1905818	regulation of chromosome separation	6	0.973191	0.00325952	3	B2RUG9, E9Q7G0, Q9JLV5
GO:0051248	negative regulation of protein metabolic process	6	0.973191	0.00328877	13	A0A0A6YW28, A0A0A6YXS7, B2RUG9, E9PVU9, E9Q3X0, H7BX99, O70493, P17439, P28653, P51910, Q3U7U3, Q99J83, Q9DC33
GO:0051049	regulation of transport	4	0.973191	0.00330584	17	A0A0A6YXS7, A0A0N4SW93, A2AIR7, B1ASU0, E9PYN1, E9Q7G0, H7BX99, O70493, P51910, P55302, Q5KU39, Q7TNF0, Q8R1B5, Q91VF2, Q99J83, Q9ERR1, Q9Z0S6
GO:1903827	regulation of cellular protein localization	5	0.973191	0.00361478	8	A0A0A6YXS7, A0A0N4SW93, B2RUG9, E9Q7G0, H7BX99, P51910, Q91VF2, Q9ERR1
GO:0006626	protein targeting to mitochondrion	10	0.973191	0.00382941	2	O88441, Q3U7U3
GO:1901565	organonitrogen compound catabolic process	4	0.973191	0.00385266	10	E9PWY6, E9PXB0, P17439, P35283, P52760, Q8CFA2, Q91VF2, Q9ESP1, Q9JLV5, Q9QZF2
GO:0090036	regulation of protein kinase C signaling	7	0.973191	0.00402479	2	A0A0R4J0Y4, Q4V9Z5
GO:0032880	regulation of protein localization	4	0.973191	0.00419366	11	A0A0A6YXS7, A0A0N4SW93, B2RUG9, E9PYN1, E9Q7G0, H7BX99, O70493, P51910, Q91VF2, Q99J83, Q9ERR1
GO:1903599	positive regulation of autophagy of mitochondrion	8	0.973191	0.00422472	2	P17439, Q3U7U3
GO:0044270	cellular nitrogen compound catabolic process	4	0.973191	0.00431514	7	A0A023T778, O35945, O70250, Q6NSQ9, Q6NZR5, Q8CI75, Q91VF2
GO:0046434	organophosphate catabolic process	5	0.973191	0.00436347	6	E9PXB0, O35945, O70250, P51432, Q6NSQ9, Q91WG7
GO:0046700	heterocycle catabolic process	4	0.973191	0.00439677	7	A0A023T778, O35945, O70250, Q6NSQ9, Q6NZR5, Q8CI75, Q91VF2
GO:1900015	regulation of cytokine production involved in inflammatory response	7	0.973191	0.00442917	2	H7BX99, P51910
GO:0006006	glucose metabolic process	6	0.973191	0.00446689	4	O35945, O70250, P51910, Q6NSQ9
GO:0016042	lipid catabolic process	4	0.973191	0.0045278	6	E9PXB0, P17439, P51432, Q07417, Q91WG7, Q9EQ06
GO:0019439	aromatic compound catabolic process	4	0.973191	0.00459181	7	A0A023T778, O35945, O70250, Q6NSQ9, Q6NZR5, Q8CI75, Q91VF2
GO:0046823	negative regulation of nucleocytoplasmic transport	7	0.973191	0.00463812	2	A0A0A6YXS7, P51910
GO:0019464	glycine decarboxylation via glycine cleavage system	11	0.973191	0.00469144	1	Q8CFA2
GO:1990074	polyuridylation-dependent mRNA catabolic process	9	0.973191	0.00469144	1	Q8CI75
GO:0070478	nuclear-transcribed mRNA catabolic process, 3'-5' exonucleolytic nonsense-mediated decay	12	0.973191	0.00469144	1	Q6NZR5
GO:1904457	positive regulation of neuronal action potential	8	0.973191	0.00469144	1	P17439
GO:0051838	cytolysis by host of symbiont cells	8	0.973191	0.00469144	1	H7BX99
GO:0021503	neural fold bending	6	0.973191	0.00469144	1	Q8R4U7
GO:0001692	histamine metabolic process	7	0.973191	0.00469144	1	Q91VF2
GO:0097531	mast cell migration	7	0.973191	0.00469144	1	P05532
GO:0038109	Kit signaling pathway	8	0.973191	0.00469144	1	P05532
GO:0006839	mitochondrial transport	4	0.997542	0.00492975	4	A2ASZ8, O88441, Q3U7U3, Q9DB41
GO:0009892	negative regulation of metabolic process	4	1	0.00509058	24	A0A023T778, A0A0A6YW28, A0A0A6YXS7, B2RUG9, E9PVU9, E9PZP8, E9Q3X0, H7BX99, O70493, P17439, P28653, P51910, P55302, P60853, Q0VBD0, Q3U7U3, Q6NZR5, Q8CI75, Q99J83, Q99J95, Q9D8T7, Q9DC33, Q9JLV5, Q9R190
GO:0000184	nuclear-transcribed mRNA catabolic process, nonsense-mediated decay	10	1	0.00529178	2	A0A023T778, Q6NZR5
GO:0044237	cellular metabolic process	2	1	0.00538825	51	A0A023T778, A0A0A6YW28, A0A0G2JDK3, A2ASZ8, A6H611, D3YU60, E9PVU9, E9PWY6, E9PXB0, E9PYT3, E9PZP8, F8WIK0, H3BJ30, O35945, O70250, P00015, P05532, P13634, P17439, P28653, P35283, P51432, P61080, P70122, Q07417, Q0VBD0, Q3U7U3, Q5ICG5, Q61282, Q66GT5, Q6NSQ9, Q6NZR5, Q8BN59, Q8BRK8, Q8C7E4, Q8CFA2, Q8CI75, Q91VF2, Q91WC9, Q91WG7, Q99J83, Q99J95, Q9CWE0, Q9EQ06, Q9ESP1, Q9JIK5, Q9JKY7, Q9JLV5, Q9Q…
GO:0071346	cellular response to interferon-gamma	6	1	0.00552107	3	O35188, P35283, Q80X90
GO:0032269	negative regulation of cellular protein metabolic process	7	1	0.0055962	12	A0A0A6YW28, A0A0A6YXS7, B2RUG9, E9PVU9, E9Q3X0, H7BX99, O70493, P17439, P28653, Q3U7U3, Q99J83, Q9DC33
GO:0042133	neurotransmitter metabolic process	4	1	0.0056828	4	E9PWY6, Q8CFA2, Q91VF2, Q91WC9
GO:0017144	drug metabolic process	3	1	0.00590685	9	A2ASZ8, E9PWY6, O35945, O70250, P00015, Q6NSQ9, Q8CFA2, Q91WG7, Q9JKY7
GO:0051649	establishment of localization in cell	3	1	0.00596312	14	A0A0N4SW93, A2AIR7, D3YZA1, F6W2Q5, O88441, P05532, P35283, Q3U7U3, Q5KU39, Q7TNF0, Q8R1B5, Q9ERR1, Q9JLV5, Q9QXK3
GO:0033047	regulation of mitotic sister chromatid segregation	8	1	0.00614771	3	B2RUG9, E9Q7G0, Q9JLV5
GO:0006547	histidine metabolic process	8	1	0.00646924	2	O35945, Q91VF2
GO:0052803	imidazole-containing compound metabolic process	4	1	0.00646924	2	O35945, Q91VF2
GO:0010605	negative regulation of macromolecule metabolic process	5	1	0.00672291	22	A0A023T778, A0A0A6YW28, A0A0A6YXS7, B2RUG9, E9PVU9, E9Q3X0, H7BX99, O70493, P17439, P28653, P51910, P55302, Q0VBD0, Q3U7U3, Q6NZR5, Q8CI75, Q99J83, Q99J95, Q9D8T7, Q9DC33, Q9JLV5, Q9R190
GO:0033157	regulation of intracellular protein transport	7	1	0.00696395	5	A0A0A6YXS7, A0A0N4SW93, P51910, Q91VF2, Q9ERR1
GO:0060374	mast cell differentiation	6	1	0.00702897	1	P05532
GO:0051801	cytolysis in other organism involved in symbiotic interaction	7	1	0.00702897	1	H7BX99
GO:0006546	glycine catabolic process	10	1	0.00702897	1	Q8CFA2
GO:0051041	positive regulation of calcium-independent cell-cell adhesion	6	1	0.00702897	1	O35188
GO:2000098	negative regulation of smooth muscle cell-matrix adhesion	8	1	0.00702897	1	P51910
GO:0008152	metabolic process	1	1	0.00743496	56	A0A023T778, A0A0A6YW28, A0A0G2JDK3, A2AIH8, A2ASZ8, A6H611, D3YU60, E9PVU9, E9PWY6, E9PXB0, E9PYT3, E9PZP8, F8WIK0, H3BJ30, O35945, O70250, P00015, P05532, P13634, P17439, P28653, P35283, P51432, P51910, P52760, P61080, P70122, Q07417, Q0VBD0, Q3TMH2, Q3U7U3, Q5ICG5, Q61282, Q66GT5, Q6NSQ9, Q6NZR5, Q8BN59, Q8BRK8, Q8C7E4, Q8CFA2, Q8CI75, Q8K411, Q91VF2, Q91WC9, Q91WG7, Q99J83, Q99J95, Q9CWE0, Q9E…
GO:1903320	regulation of protein modification by small protein conjugation or removal	8	1	0.00748487	5	A0A0A6YW28, P61080, Q99J83, Q99J95, Q9DC33
GO:0032418	lysosome localization	4	1	0.00748887	2	P05532, Q9ERR1
GO:0006887	exocytosis	6	1	0.00756934	4	P05532, Q3TMH2, Q7TNF0, Q8R1B5
GO:1900181	negative regulation of protein localization to nucleus	7	1	0.00775439	2	A0A0A6YXS7, P51910
GO:0045736	negative regulation of cyclin-dependent protein serine/threonine kinase activity	12	1	0.00775439	2	B2RUG9, Q3U7U3
GO:0051984	positive regulation of chromosome segregation	5	1	0.00775439	2	E9Q7G0, Q9JLV5
GO:0034341	response to interferon-gamma	5	1	0.00814701	3	O35188, P35283, Q80X90
GO:0016226	iron-sulfur cluster assembly	5	1	0.00829801	2	F8WIK0, Q9Z1J3
GO:0031163	metallo-sulfur cluster assembly	4	1	0.00829801	2	F8WIK0, Q9Z1J3
GO:0099643	signal release from synapse	7	1	0.00853489	3	A2AIR7, Q7TNF0, Q8R1B5
GO:0031329	regulation of cellular catabolic process	5	1	0.0087796	9	E9PVU9, E9PZP8, O70250, P17439, P35283, P60853, Q3U7U3, Q8BRK8, Q9D8T7
GO:0033044	regulation of chromosome organization	6	1	0.00908178	6	B2RUG9, D3YZA1, E9Q7G0, Q99J83, Q99J95, Q9JLV5
GO:0051656	establishment of organelle localization	4	1	0.00914154	5	P05532, Q7TNF0, Q8R1B5, Q9ERR1, Q9JLV5
GO:0044242	cellular lipid catabolic process	5	1	0.00914154	5	E9PXB0, P17439, P51432, Q07417, Q91WG7
GO:1904030	negative regulation of cyclin-dependent protein kinase activity	11	1	0.00914461	2	B2RUG9, Q3U7U3
GO:0006029	proteoglycan metabolic process	6	1	0.00914461	2	Q61282, Q9QZF2
GO:0051186	cofactor metabolic process	3	1	0.00922982	8	D3YU60, F8WIK0, O35945, O70250, P00015, Q6NSQ9, Q91WG7, Q9Z1J3
GO:0051223	regulation of protein transport	6	1	0.00922982	8	A0A0A6YXS7, A0A0N4SW93, E9PYN1, O70493, P51910, Q91VF2, Q99J83, Q9ERR1
GO:0048468	cell development	3	1	0.00927175	8	P05532, P62737, Q61282, Q80X90, Q8VHX6, Q99J83, Q99LC8, Q9D8T7
GO:0120032	regulation of plasma membrane bounded cell projection assembly	7	1	0.00927245	4	B2RUG9, Q4VBD2, Q99J83, Q9ERR1
GO:0061739	protein lipidation involved in autophagosome assembly	10	1	0.00936106	1	Q99J83
GO:2000405	negative regulation of T cell migration	10	1	0.00936106	1	P51910
GO:0042184	xylene catabolic process	6	1	0.00936106	1	O35945
GO:0018970	toluene metabolic process	6	1	0.00936106	1	O35945
GO:0035701	hematopoietic stem cell migration	5	1	0.00936106	1	P05532
GO:1900738	positive regulation of phospholipase C-activating G protein-coupled receptor signaling pathway	8	1	0.00936106	1	H7BX99
GO:0051040	regulation of calcium-independent cell-cell adhesion	5	1	0.00936106	1	O35188
GO:0006680	glucosylceramide catabolic process	10	1	0.00936106	1	P17439
GO:2000097	regulation of smooth muscle cell-matrix adhesion	6	1	0.00936106	1	P51910
GO:0042203	toluene catabolic process	7	1	0.00936106	1	O35945
GO:0018948	xylene metabolic process	5	1	0.00936106	1	O35945
GO:0006710	androgen catabolic process	7	1	0.00936106	1	Q9EQ06
GO:0014012	peripheral nervous system axon regeneration	8	1	0.00936106	1	P51910
GO:0072490	toluene-containing compound metabolic process	5	1	0.00936106	1	O35945
GO:0072491	toluene-containing compound catabolic process	6	1	0.00936106	1	O35945
GO:1900222	negative regulation of amyloid-beta clearance	5	1	0.00936106	1	P55302
GO:1903837	regulation of mRNA 3'-UTR binding	6	1	0.00936106	1	Q99J95
GO:1903839	positive regulation of mRNA 3'-UTR binding	7	1	0.00936106	1	Q99J95
GO:0060491	regulation of cell projection assembly	6	1	0.00954767	4	B2RUG9, Q4VBD2, Q99J83, Q9ERR1
GO:0051051	negative regulation of transport	5	1	0.00964707	6	A0A0A6YXS7, B1ASU0, O70493, P51910, P55302, Q99J83
GO:0006515	protein quality control for misfolded or incompletely synthesized proteins	7	1	0.00972953	2	Q9ESP1, Q9JLV5
GO:0033045	regulation of sister chromatid segregation	7	1	0.00990538	3	B2RUG9, E9Q7G0, Q9JLV5
GO:1903321	negative regulation of protein modification by small protein conjugation or removal	9	1	0.010049	3	A0A0A6YW28, Q99J83, Q9DC33
GO:0034655	nucleobase-containing compound catabolic process	5	1	0.0101171	6	A0A023T778, O35945, O70250, Q6NSQ9, Q6NZR5, Q8CI75
GO:0008217	regulation of blood pressure	3	1	0.0104873	3	A2AIR7, P51432, P62737
GO:0030595	leukocyte chemotaxis	6	1	0.0107856	3	O35188, P05532, P70122
GO:0060627	regulation of vesicle-mediated transport	5	1	0.0109215	7	A0A0N4SW93, B1ASU0, O70493, P55302, Q5KU39, Q7TNF0, Q99J83
GO:0044265	cellular macromolecule catabolic process	5	1	0.0112456	9	A0A023T778, A0A0A6YW28, P35283, P61080, Q3U7U3, Q6NZR5, Q8CI75, Q9JLV5, Q9QZF2
GO:0009057	macromolecule catabolic process	4	1	0.0114771	10	A0A023T778, A0A0A6YW28, P35283, P61080, Q3U7U3, Q6NZR5, Q8CI75, Q9ESP1, Q9JLV5, Q9QZF2
GO:0120034	positive regulation of plasma membrane bounded cell projection assembly	8	1	0.0115526	3	B2RUG9, Q4VBD2, Q9ERR1
GO:0046903	secretion	4	1	0.0116248	6	A2AIR7, E9PXB0, P05532, Q3TMH2, Q7TNF0, Q8R1B5
GO:0061082	myeloid leukocyte cytokine production	4	1	0.0116877	1	P05532
GO:0072144	glomerular mesangial cell development	5	1	0.0116877	1	P62737
GO:0030200	heparan sulfate proteoglycan catabolic process	8	1	0.0116877	1	Q9QZF2
GO:0072576	liver morphogenesis	5	1	0.0116877	1	Q9JLV5
GO:0038162	erythropoietin-mediated signaling pathway	7	1	0.0116877	1	P05532
GO:0042271	susceptibility to natural killer cell mediated cytotoxicity	10	1	0.0116877	1	E9PYN1
GO:0000961	negative regulation of mitochondrial RNA catabolic process	9	1	0.0116877	1	Q9D8T7
GO:1902774	late endosome to lysosome transport	6	1	0.0116877	1	Q5KU39
GO:0000956	nuclear-transcribed mRNA catabolic process	9	1	0.0117097	3	A0A023T778, Q6NZR5, Q8CI75
GO:0001676	long-chain fatty acid metabolic process	8	1	0.011868	3	E9PXB0, Q5ICG5, Q91WC9
GO:0090087	regulation of peptide transport	5	1	0.0121099	8	A0A0A6YXS7, A0A0N4SW93, E9PYN1, O70493, P51910, Q91VF2, Q99J83, Q9ERR1
GO:0046907	intracellular transport	4	1	0.0121839	12	A0A0N4SW93, D3YZA1, F6W2Q5, O88441, P05532, P35283, Q3U7U3, Q5KU39, Q7TNF0, Q8R1B5, Q9ERR1, Q9QXK3
GO:0045055	regulated exocytosis	7	1	0.0121883	3	P05532, Q7TNF0, Q8R1B5
GO:0032787	monocarboxylic acid metabolic process	6	1	0.0123316	7	E9PXB0, O35945, O70250, Q07417, Q5ICG5, Q6NSQ9, Q91WC9
GO:0070201	regulation of establishment of protein localization	5	1	0.0125249	8	A0A0A6YXS7, A0A0N4SW93, E9PYN1, O70493, P51910, Q91VF2, Q99J83, Q9ERR1
GO:1900180	regulation of protein localization to nucleus	6	1	0.0128438	3	A0A0A6YXS7, H7BX99, P51910
GO:0042737	drug catabolic process	4	1	0.0128438	3	O35945, Q8CFA2, Q9JKY7
GO:0006096	glycolytic process	12	1	0.0131789	3	O35945, O70250, Q6NSQ9
GO:0090317	negative regulation of intracellular protein transport	8	1	0.0132324	2	A0A0A6YXS7, P51910
GO:0006757	ATP generation from ADP	11	1	0.0133484	3	O35945, O70250, Q6NSQ9
GO:0019362	pyridine nucleotide metabolic process	8	1	0.0133864	4	O35945, O70250, Q6NSQ9, Q91WG7
GO:0030167	proteoglycan catabolic process	7	1	0.0140089	1	Q9QZF2
GO:1902846	positive regulation of mitotic spindle elongation	11	1	0.0140089	1	E9Q7G0
GO:0032888	regulation of mitotic spindle elongation	10	1	0.0140089	1	E9Q7G0
GO:0032887	regulation of spindle elongation	9	1	0.0140089	1	E9Q7G0
GO:0110028	positive regulation of mitotic spindle organization	10	1	0.0140089	1	E9Q7G0
GO:1905065	positive regulation of vascular smooth muscle cell differentiation	8	1	0.0140089	1	P05532
GO:0071449	cellular response to lipid hydroperoxide	6	1	0.0140089	1	D3YU60
GO:1902363	regulation of protein localization to spindle pole body	6	1	0.0140089	1	E9Q7G0
GO:1902365	positive regulation of protein localization to spindle pole body	7	1	0.0140089	1	E9Q7G0
GO:0051306	mitotic sister chromatid separation	4	1	0.0140089	1	Q8CI75
GO:0001831	trophectodermal cellular morphogenesis	6	1	0.0140089	1	Q9JLV5
GO:0070945	neutrophil mediated killing of gram-negative bacterium	10	1	0.0140089	1	H7BX99
GO:0055048	anastral spindle assembly	8	1	0.0140089	1	E9Q7G0
GO:0072524	pyridine-containing compound metabolic process	4	1	0.0143282	4	O35945, O70250, Q6NSQ9, Q91WG7
GO:0042866	pyruvate biosynthetic process	8	1	0.0143912	3	O35945, O70250, Q6NSQ9
GO:0006402	mRNA catabolic process	8	1	0.0143912	3	A0A023T778, Q6NZR5, Q8CI75
GO:0008333	endosome to lysosome transport	6	1	0.0149798	2	P35283, Q5KU39
GO:0006094	gluconeogenesis	7	1	0.0158517	3	O35945, O70250, Q6NSQ9
GO:0019319	hexose biosynthetic process	6	1	0.0162294	3	O35945, O70250, Q6NSQ9
GO:0006627	protein processing involved in protein targeting to mitochondrion	8	1	0.0163248	1	A6H611
GO:0072143	mesangial cell development	4	1	0.0163248	1	P62737
GO:0006982	response to lipid hydroperoxide	5	1	0.0163248	1	D3YU60
GO:0052805	imidazole-containing compound catabolic process	5	1	0.0163248	1	Q91VF2
GO:0071500	cellular response to nitrosative stress	4	1	0.0163248	1	Q99J83
GO:0051971	positive regulation of transmission of nerve impulse	7	1	0.0163248	1	P17439
GO:0010587	miRNA catabolic process	9	1	0.0163248	1	Q8CI75
GO:0039689	negative stranded viral RNA replication	7	1	0.0163248	1	Q99J83
GO:0038028	insulin receptor signaling pathway via phosphatidylinositol 3-kinase	9	1	0.0163248	1	A0A0N4SW93
GO:0043456	regulation of pentose-phosphate shunt	9	1	0.0163248	1	O70250
GO:2001252	positive regulation of chromosome organization	7	1	0.0163353	4	D3YZA1, E9Q7G0, Q99J95, Q9JLV5
GO:0042306	regulation of protein import into nucleus	8	1	0.0164451	2	A0A0A6YXS7, P51910
GO:0051130	positive regulation of cellular component organization	5	1	0.016593	12	A0A0N4SW93, B2RUG9, D3YZA1, E9PYT3, E9Q7G0, P17439, Q3U7U3, Q4VBD2, Q91VF2, Q99J95, Q9ERR1, Q9JLV5
GO:0009895	negative regulation of catabolic process	5	1	0.0165975	5	E9PVU9, E9PZP8, O70493, P60853, Q9D8T7
GO:0015980	energy derivation by oxidation of organic compounds	4	1	0.0173927	3	A2ASZ8, P00015, Q9CWE0
GO:1904589	regulation of protein import	7	1	0.0175826	2	A0A0A6YXS7, P51910
GO:0046031	ADP metabolic process	10	1	0.0177906	3	O35945, O70250, Q6NSQ9
GO:0046364	monosaccharide biosynthetic process	5	1	0.0179915	3	O35945, O70250, Q6NSQ9
GO:2000642	negative regulation of early endosome to late endosome transport	8	1	0.0186352	1	O70493
GO:0044346	fibroblast apoptotic process	5	1	0.0186352	1	Q9JLV5
GO:0045760	positive regulation of action potential	5	1	0.0186352	1	P17439
GO:2000402	negative regulation of lymphocyte migration	9	1	0.0186352	1	P51910
GO:0015760	glucose-6-phosphate transport	7	1	0.0186352	1	Q6NSQ9
GO:1900736	regulation of phospholipase C-activating G protein-coupled receptor signaling pathway	7	1	0.0186352	1	H7BX99
GO:0000960	regulation of mitochondrial RNA catabolic process	7	1	0.0186352	1	Q9D8T7
GO:1903650	negative regulation of cytoplasmic transport	7	1	0.0186352	1	O70493
GO:0050747	positive regulation of lipoprotein metabolic process	7	1	0.0186352	1	P17439
GO:0023021	termination of signal transduction	7	1	0.0186352	1	P17439
GO:0015712	hexose phosphate transport	6	1	0.0186352	1	Q6NSQ9
GO:0002318	myeloid progenitor cell differentiation	5	1	0.0186352	1	P05532
GO:1903061	positive regulation of protein lipidation	9	1	0.0186352	1	P17439
GO:0010915	regulation of very-low-density lipoprotein particle clearance	5	1	0.0186352	1	P55302
GO:0010916	negative regulation of very-low-density lipoprotein particle clearance	6	1	0.0186352	1	P55302
GO:0018283	iron incorporation into metallo-sulfur cluster	8	1	0.0186352	1	Q9Z1J3
GO:0018282	metal incorporation into metallo-sulfur cluster	7	1	0.0186352	1	Q9Z1J3
GO:0007100	mitotic centrosome separation	4	1	0.0186352	1	Q9ERR1
GO:0006567	threonine catabolic process	10	1	0.0186352	1	E9PWY6
GO:0046338	phosphatidylethanolamine catabolic process	8	1	0.0186352	1	E9PXB0
GO:0070944	neutrophil mediated killing of bacterium	9	1	0.0186352	1	H7BX99
GO:0045840	positive regulation of mitotic nuclear division	8	1	0.0187526	2	E9Q7G0, Q9JLV5
GO:0016241	regulation of macroautophagy	7	1	0.0188074	3	P35283, P60853, Q8BRK8
GO:0045806	negative regulation of endocytosis	7	1	0.0195504	2	P55302, Q99J83
GO:0001933	negative regulation of protein phosphorylation	9	1	0.01963	6	A0A0A6YXS7, B2RUG9, E9Q3X0, P17439, P28653, Q3U7U3
GO:0009060	aerobic respiration	6	1	0.0199545	2	P00015, Q9CWE0
GO:0019318	hexose metabolic process	5	1	0.020106	4	O35945, O70250, P51910, Q6NSQ9
GO:0046034	ATP metabolic process	10	1	0.0205553	4	A2ASZ8, O35945, O70250, Q6NSQ9
GO:0031396	regulation of protein ubiquitination	9	1	0.0205553	4	A0A0A6YW28, P61080, Q99J83, Q99J95
GO:0008090	retrograde axonal transport	9	1	0.0209402	1	Q9ERR1
GO:2000619	negative regulation of histone H4-K16 acetylation	13	1	0.0209402	1	Q99J83
GO:0050748	negative regulation of lipoprotein metabolic process	7	1	0.0209402	1	P51910
GO:0019800	peptide cross-linking via chondroitin 4-sulfate glycosaminoglycan	9	1	0.0209402	1	P28653
GO:1905063	regulation of vascular smooth muscle cell differentiation	7	1	0.0209402	1	P05532
GO:0044571	[2Fe-2S] cluster assembly	6	1	0.0209402	1	Q9Z1J3
GO:0006165	nucleoside diphosphate phosphorylation	9	1	0.0213771	3	O35945, O70250, Q6NSQ9
GO:0051983	regulation of chromosome segregation	4	1	0.0218232	3	B2RUG9, E9Q7G0, Q9JLV5
GO:0019359	nicotinamide nucleotide biosynthetic process	10	1	0.0218232	3	O35945, O70250, Q6NSQ9
GO:1903829	positive regulation of cellular protein localization	6	1	0.0220021	5	A0A0N4SW93, B2RUG9, E9Q7G0, H7BX99, Q91VF2
GO:0019363	pyridine nucleotide biosynthetic process	9	1	0.0220481	3	O35945, O70250, Q6NSQ9
GO:1903047	mitotic cell cycle process	3	1	0.0224143	6	B2RUG9, P60853, P70122, Q8CI75, Q9ERR1, Q9JLV5
GO:0032940	secretion by cell	5	1	0.0224984	5	A2AIR7, P05532, Q3TMH2, Q7TNF0, Q8R1B5
GO:0072525	pyridine-containing compound biosynthetic process	5	1	0.0227306	3	O35945, O70250, Q6NSQ9
GO:0030071	regulation of mitotic metaphase/anaphase transition	10	1	0.0228806	2	B2RUG9, Q9JLV5
GO:0098908	regulation of neuronal action potential	7	1	0.0232399	1	P17439
GO:0046477	glycosylceramide catabolic process	9	1	0.0232399	1	P17439
GO:0051715	cytolysis in other organism	6	1	0.0232399	1	H7BX99
GO:0045842	positive regulation of mitotic metaphase/anaphase transition	11	1	0.0232399	1	Q9JLV5
GO:1902101	positive regulation of metaphase/anaphase transition of cell cycle	9	1	0.0232399	1	Q9JLV5
GO:0090131	mesenchyme migration	3	1	0.0232399	1	P62737
GO:0071638	negative regulation of monocyte chemotactic protein-1 production	7	1	0.0232399	1	P51910
GO:0010985	negative regulation of lipoprotein particle clearance	5	1	0.0232399	1	P55302
GO:1902031	regulation of NADP metabolic process	8	1	0.0232399	1	O70250
GO:1901970	positive regulation of mitotic sister chromatid separation	10	1	0.0232399	1	Q9JLV5
GO:0051650	establishment of vesicle localization	5	1	0.0234244	3	Q7TNF0, Q8R1B5, Q9ERR1
GO:0033043	regulation of organelle organization	5	1	0.0236833	13	A0A0N4SW93, B2RUG9, D3YZA1, E9PYT3, E9Q7G0, P17439, Q3U7U3, Q4VBD2, Q5KU39, Q91VF2, Q99J83, Q99J95, Q9JLV5
GO:0051785	positive regulation of nuclear division	7	1	0.0241855	2	E9Q7G0, Q9JLV5
GO:0051303	establishment of chromosome localization	5	1	0.0241855	2	Q9ERR1, Q9JLV5
GO:0006687	glycosphingolipid metabolic process	7	1	0.0246062	3	P05532, P17439, Q0VBD0
GO:0097164	ammonium ion metabolic process	3	1	0.0246062	3	E9PXB0, P17439, Q91VF2
GO:1902099	regulation of metaphase/anaphase transition of cell cycle	8	1	0.0246272	2	B2RUG9, Q9JLV5
GO:0051648	vesicle localization	4	1	0.0250879	3	Q7TNF0, Q8R1B5, Q9ERR1
GO:0006629	lipid metabolic process	3	1	0.0252304	11	E9PXB0, P05532, P17439, P51432, Q07417, Q0VBD0, Q5ICG5, Q8BRK8, Q91WC9, Q91WG7, Q9EQ06
GO:0034638	phosphatidylcholine catabolic process	8	1	0.0255342	1	E9PXB0
GO:1905832	positive regulation of spindle assembly	10	1	0.0255342	1	E9Q7G0
GO:0051409	response to nitrosative stress	3	1	0.0255342	1	Q99J83
GO:0006678	glucosylceramide metabolic process	9	1	0.0255342	1	P17439
GO:0035973	aggrephagy	7	1	0.0255342	1	Q99J83
GO:0071630	nuclear protein quality control by the ubiquitin-proteasome system	10	1	0.0255342	1	Q9JLV5
GO:1903059	regulation of protein lipidation	8	1	0.0255342	1	P17439
GO:0070942	neutrophil mediated cytotoxicity	6	1	0.0255342	1	H7BX99
GO:0070943	neutrophil mediated killing of symbiont cell	8	1	0.0255342	1	H7BX99
GO:0009135	purine nucleoside diphosphate metabolic process	8	1	0.0258198	3	O35945, O70250, Q6NSQ9
GO:0009179	purine ribonucleoside diphosphate metabolic process	9	1	0.0258198	3	O35945, O70250, Q6NSQ9
GO:0016079	synaptic vesicle exocytosis	9	1	0.0259718	2	Q7TNF0, Q8R1B5
GO:0050900	leukocyte migration	5	1	0.0263141	3	O35188, P05532, P70122
GO:0032268	regulation of cellular protein metabolic process	6	1	0.0264734	21	A0A0A6YW28, A0A0A6YXS7, B2RUG9, D3YZA1, E9PVU9, E9Q3X0, H7BX99, O35188, O70493, P00015, P05532, P17439, P28653, P61080, Q3U7U3, Q8BN59, Q99J83, Q99J95, Q99LC8, Q9CXU9, Q9DC33
GO:0006401	RNA catabolic process	7	1	0.0265632	3	A0A023T778, Q6NZR5, Q8CI75
GO:0009395	phospholipid catabolic process	6	1	0.0265632	3	E9PXB0, P51432, Q91WG7
GO:0042326	negative regulation of phosphorylation	8	1	0.0266035	6	A0A0A6YXS7, B2RUG9, E9Q3X0, P17439, P28653, Q3U7U3
GO:0032989	cellular component morphogenesis	3	1	0.0266035	6	A2A9R6, A2AKX2, Q80X90, Q9D8T7, Q9ERR1, Q9JLV5
GO:0016192	vesicle-mediated transport	4	1	0.0267547	10	F6W2Q5, P05532, P35283, P55302, Q3TMH2, Q5KU39, Q7TNF0, Q8CHU3, Q8R1B5, Q9QXK3
GO:1902017	regulation of cilium assembly	8	1	0.0268844	2	Q4VBD2, Q99J83
GO:0009185	ribonucleoside diphosphate metabolic process	8	1	0.0270651	3	O35945, O70250, Q6NSQ9
GO:0010965	regulation of mitotic sister chromatid separation	9	1	0.0273456	2	B2RUG9, Q9JLV5
GO:0042730	fibrinolysis	9	1	0.0278232	1	H7BX99
GO:1903373	positive regulation of endoplasmic reticulum tubular network organization	7	1	0.0278232	1	E9PYT3
GO:2001168	positive regulation of histone H2B ubiquitination	12	1	0.0278232	1	Q99J95
GO:2001166	regulation of histone H2B ubiquitination	11	1	0.0278232	1	Q99J95
GO:0002320	lymphoid progenitor cell differentiation	5	1	0.0278232	1	P05532
GO:0051299	centrosome separation	3	1	0.0278232	1	Q9ERR1
GO:0006605	protein targeting	9	1	0.0278274	3	O88441, Q3U7U3, Q5KU39
GO:0072330	monocarboxylic acid biosynthetic process	7	1	0.0280435	4	E9PXB0, O35945, O70250, Q6NSQ9
GO:1903146	regulation of autophagy of mitochondrion	7	1	0.0282774	2	P17439, Q3U7U3
GO:0046939	nucleotide phosphorylation	8	1	0.0288616	3	O35945, O70250, Q6NSQ9
GO:0009267	cellular response to starvation	6	1	0.0288616	3	P17439, Q8BRK8, Q99J83
GO:0006733	oxidoreduction coenzyme metabolic process	5	1	0.0291495	4	O35945, O70250, Q6NSQ9, Q91WG7
GO:0019221	cytokine-mediated signaling pathway	6	1	0.0291495	4	B1ASU0, O35188, P05532, P28653
GO:0044238	primary metabolic process	2	1	0.0293713	48	A0A023T778, A0A0A6YW28, A0A0G2JDK3, A2ASZ8, A6H611, E9PVU9, E9PWY6, E9PXB0, E9PYT3, E9PZP8, H3BJ30, O35945, O70250, P05532, P17439, P28653, P35283, P51432, P51910, P61080, P70122, Q07417, Q0VBD0, Q3TMH2, Q3U7U3, Q5ICG5, Q61282, Q66GT5, Q6NSQ9, Q6NZR5, Q8BN59, Q8BRK8, Q8C7E4, Q8CFA2, Q8CI75, Q8K411, Q91VF2, Q91WC9, Q91WG7, Q99J83, Q99J95, Q9EQ06, Q9ESP1, Q9JIK5, Q9JLV5, Q9QZF2, Q9R190, Q9Z1J3
GO:1901135	carbohydrate derivative metabolic process	3	1	0.0297073	10	A2ASZ8, O35945, O70250, P05532, P17439, P28653, Q0VBD0, Q61282, Q6NSQ9, Q9QZF2
GO:0055114	oxidation-reduction process	2	1	0.0298032	10	A2AIH8, A2ASZ8, D3YU60, F8WIK0, O35945, P00015, Q07417, Q9CWE0, Q9EQ06, Q9JKY7
GO:0005996	monosaccharide metabolic process	4	1	0.0299011	4	O35945, O70250, P51910, Q6NSQ9
GO:0016043	cellular component organization	2	1	0.0300749	34	A0A0A6YW28, A0A0N4SWB9, A0A0R4J0Y4, A2A9R6, A2AKX2, B2RUG9, D3YWI4, E9PWY6, E9PYT3, E9PZP8, E9Q7G0, F6W2Q5, F8WIK0, H3BJ30, O70493, P05532, P17439, P51910, P70122, Q04857, Q4V9Z5, Q5KU39, Q61282, Q7TNF0, Q80X90, Q8BRK8, Q99J83, Q9CWE0, Q9D8T7, Q9DBS1, Q9ERR1, Q9JLV5, Q9R190, Q9Z1J3
GO:0048539	bone marrow development	5	1	0.0301069	1	P70122
GO:0035234	ectopic germ cell programmed cell death	5	1	0.0301069	1	P05532
GO:0043471	regulation of cellular carbohydrate catabolic process	7	1	0.0301069	1	O70250
GO:0070257	positive regulation of mucus secretion	7	1	0.0301069	1	Q99J83
GO:0060052	neurofilament cytoskeleton organization	6	1	0.0301069	1	Q9ERR1
GO:0071763	nuclear membrane organization	4	1	0.0301069	1	Q9DBS1
GO:0014829	vascular smooth muscle contraction	9	1	0.0301069	1	P62737
GO:0019369	arachidonic acid metabolic process	9	1	0.0301789	2	E9PXB0, Q91WC9
GO:0007626	locomotory behavior	2	1	0.0304723	4	A0A0R4J0Y4, A2A9R6, A2AIR7, Q4V9Z5
GO:0031667	response to nutrient levels	4	1	0.0308567	4	A2ASZ8, P17439, Q8BRK8, Q99J83
GO:0016052	carbohydrate catabolic process	4	1	0.0312624	3	O35945, O70250, Q6NSQ9
GO:0023061	signal release	6	1	0.0312624	3	A2AIR7, Q7TNF0, Q8R1B5
GO:0051246	regulation of protein metabolic process	5	1	0.031316	22	A0A0A6YW28, A0A0A6YXS7, B2RUG9, D3YZA1, E9PVU9, E9Q3X0, H7BX99, O35188, O70493, P00015, P05532, P17439, P28653, P51910, P61080, Q3U7U3, Q8BN59, Q99J83, Q99J95, Q99LC8, Q9CXU9, Q9DC33
GO:0071704	organic substance metabolic process	2	1	0.0315186	50	A0A023T778, A0A0A6YW28, A0A0G2JDK3, A2ASZ8, A6H611, D3YU60, E9PVU9, E9PWY6, E9PXB0, E9PYT3, E9PZP8, H3BJ30, O35945, O70250, P05532, P17439, P28653, P35283, P51432, P51910, P52760, P61080, P70122, Q07417, Q0VBD0, Q3TMH2, Q3U7U3, Q5ICG5, Q61282, Q66GT5, Q6NSQ9, Q6NZR5, Q8BN59, Q8BRK8, Q8C7E4, Q8CFA2, Q8CI75, Q8K411, Q91VF2, Q91WC9, Q91WG7, Q99J83, Q99J95, Q9EQ06, Q9ESP1, Q9JIK5, Q9JLV5, Q9QZF2, Q9R…
GO:0002443	leukocyte mediated immunity	3	1	0.0316375	2	H7BX99, P05532
GO:0031399	regulation of protein modification process	7	1	0.0317962	15	A0A0A6YW28, A0A0A6YXS7, B2RUG9, D3YZA1, E9Q3X0, H7BX99, O35188, P05532, P17439, P28653, P61080, Q3U7U3, Q99J83, Q99J95, Q9DC33
GO:0006754	ATP biosynthetic process	11	1	0.0323621	3	O35945, O70250, Q6NSQ9
GO:0003334	keratinocyte development	5	1	0.0323852	1	Q80X90
GO:0043303	mast cell degranulation	9	1	0.0323852	1	P05532
GO:0031103	axon regeneration	7	1	0.0323852	1	P51910
GO:0051152	positive regulation of smooth muscle cell differentiation	7	1	0.0323852	1	P05532
GO:0002279	mast cell activation involved in immune response	6	1	0.0323852	1	P05532
GO:0051224	negative regulation of protein transport	7	1	0.0326401	3	A0A0A6YXS7, O70493, P51910
GO:0009987	cellular process	1	1	0.0329893	85	A0A023T778, A0A0A6YW28, A0A0G2JDK3, A0A0N4SW93, A0A0N4SWB9, A0A0R4J0Y4, A2A9R6, A2AIH8, A2AIR7, A2AKX2, A2ASZ8, A6H611, B1ASU0, B2RUG9, D3YU60, D3YWI4, E9PVU9, E9PWY6, E9PXB0, E9PYN1, E9PYT3, E9PZP8, E9Q3X0, E9Q7G0, F6W2Q5, F8WIK0, H3BJ30, H7BX99, O35188, O35945, O70250, O70493, P00015, P05532, P13634, P17439, P28653, P35283, P51432, P51910, P60853, P61080, P62737, P70122, Q04857, Q07417, Q0VBD0,…
GO:0043549	regulation of kinase activity	8	1	0.0334062	8	A0A0A6YXS7, B2RUG9, E9Q3X0, H7BX99, P05532, P17439, P28653, Q3U7U3
GO:1901990	regulation of mitotic cell cycle phase transition	7	1	0.0334249	4	A0A0A6YXS7, B2RUG9, Q3U7U3, Q9JLV5
GO:0031330	negative regulation of cellular catabolic process	6	1	0.0336275	4	E9PVU9, E9PZP8, P60853, Q9D8T7
GO:0007169	transmembrane receptor protein tyrosine kinase signaling pathway	7	1	0.0336583	5	A0A0N4SW93, B2RUG9, E9Q3X0, P05532, Q9ERR1
GO:0006807	nitrogen compound metabolic process	2	1	0.033682	45	A0A023T778, A0A0A6YW28, A0A0G2JDK3, A2ASZ8, A6H611, D3YU60, E9PVU9, E9PWY6, E9PXB0, E9PYT3, E9PZP8, H3BJ30, O35945, O70250, P05532, P13634, P17439, P28653, P35283, P52760, P61080, P70122, Q0VBD0, Q3TMH2, Q3U7U3, Q61282, Q66GT5, Q6NSQ9, Q6NZR5, Q8BN59, Q8BRK8, Q8C7E4, Q8CFA2, Q8CI75, Q8K411, Q91VF2, Q91WG7, Q99J83, Q99J95, Q9ESP1, Q9JIK5, Q9JLV5, Q9QZF2, Q9R190, Q9Z1J3
GO:0007088	regulation of mitotic nuclear division	7	1	0.0337649	3	B2RUG9, E9Q7G0, Q9JLV5
GO:0060326	cell chemotaxis	5	1	0.0340492	3	O35188, P05532, P70122
GO:0031324	negative regulation of cellular metabolic process	5	1	0.0342867	20	A0A0A6YW28, A0A0A6YXS7, B2RUG9, E9PVU9, E9PZP8, E9Q3X0, H7BX99, O70493, P17439, P28653, P51910, P55302, P60853, Q3U7U3, Q99J83, Q99J95, Q9D8T7, Q9DC33, Q9JLV5, Q9R190
GO:0010822	positive regulation of mitochondrion organization	7	1	0.0346216	3	P17439, Q3U7U3, Q91VF2
GO:0072655	establishment of protein localization to mitochondrion	7	1	0.0346364	2	O88441, Q3U7U3
GO:1901264	carbohydrate derivative transport	5	1	0.0346364	2	A2ASZ8, Q6NSQ9
GO:0055015	ventricular cardiac muscle cell development	7	1	0.0346582	1	Q99J83
GO:0009071	serine family amino acid catabolic process	9	1	0.0346582	1	Q8CFA2
GO:0034982	mitochondrial protein processing	7	1	0.0346582	1	A6H611
GO:1900116	extracellular negative regulation of signal transduction	7	1	0.0346582	1	P55302
GO:1900115	extracellular regulation of signal transduction	6	1	0.0346582	1	P55302
GO:0010623	programmed cell death involved in cell development	4	1	0.0346582	1	P05532
GO:0042594	response to starvation	5	1	0.0357813	3	P17439, Q8BRK8, Q99J83
GO:0044281	small molecule metabolic process	2	1	0.0362778	20	A2ASZ8, E9PVU9, E9PWY6, E9PXB0, O35945, O70250, P13634, P17439, P28653, P51910, Q07417, Q5ICG5, Q66GT5, Q6NSQ9, Q8BRK8, Q8CFA2, Q91VF2, Q91WC9, Q91WG7, Q99J95
GO:0048534	hematopoietic or lymphoid organ development	4	1	0.0366642	3	F8WIK0, P05532, P70122
GO:0045060	negative thymic T cell selection	4	1	0.0369259	1	Q99J83
GO:0032463	negative regulation of protein homooligomerization	8	1	0.0369259	1	P17439
GO:0040037	negative regulation of fibroblast growth factor receptor signaling pathway	7	1	0.0369259	1	Q9QZF2
GO:0097324	melanocyte migration	7	1	0.0369259	1	P05532
GO:0021799	cerebral cortex radially oriented cell migration	8	1	0.0369259	1	Q9ERR1
GO:0050000	chromosome localization	4	1	0.0372164	2	Q9ERR1, Q9JLV5
GO:1904950	negative regulation of establishment of protein localization	6	1	0.0372589	3	A0A0A6YXS7, O70493, P51910
GO:0031056	regulation of histone modification	8	1	0.0381604	3	D3YZA1, Q99J83, Q99J95
GO:0009167	purine ribonucleoside monophosphate metabolic process	9	1	0.0382668	4	A2ASZ8, O35945, O70250, Q6NSQ9
GO:0006090	pyruvate metabolic process	7	1	0.0384633	3	O35945, O70250, Q6NSQ9
GO:0009126	purine nucleoside monophosphate metabolic process	8	1	0.038486	4	A2ASZ8, O35945, O70250, Q6NSQ9
GO:0071345	cellular response to cytokine stimulus	5	1	0.0385507	5	O35188, P17439, P35283, Q80X90, Q99J95
GO:0009896	positive regulation of catabolic process	5	1	0.0387268	5	B2RUG9, P17439, P35283, Q3U7U3, Q8BRK8
GO:0006516	glycoprotein catabolic process	6	1	0.0391884	1	Q9QZF2
GO:0033184	positive regulation of histone ubiquitination	11	1	0.0391884	1	Q99J95
GO:0075044	autophagy of host cells involved in interaction with symbiont	6	1	0.0391884	1	Q99J83
GO:1903371	regulation of endoplasmic reticulum tubular network organization	6	1	0.0391884	1	E9PYT3
GO:2000618	regulation of histone H4-K16 acetylation	12	1	0.0391884	1	Q99J83
GO:0018344	protein geranylgeranylation	8	1	0.0391884	1	A0A0G2JDK3
GO:0002091	negative regulation of receptor internalization	9	1	0.0391884	1	P55302
GO:0019065	receptor-mediated endocytosis of virus by host cell	7	1	0.0391884	1	F6W2Q5
GO:0042256	mature ribosome assembly	8	1	0.0391884	1	P70122
GO:0046512	sphingosine biosynthetic process	9	1	0.0391884	1	P17439
GO:0075071	autophagy involved in symbiotic interaction	5	1	0.0391884	1	Q99J83
GO:0016050	vesicle organization	4	1	0.03937	4	O70493, Q5KU39, Q7TNF0, Q9JLV5
GO:0017156	calcium ion regulated exocytosis	8	1	0.0398679	2	Q7TNF0, Q8R1B5
GO:0009991	response to extracellular stimulus	3	1	0.0402655	4	A2ASZ8, P17439, Q8BRK8, Q99J83
GO:0009205	purine ribonucleoside triphosphate metabolic process	9	1	0.0404912	4	A2ASZ8, O35945, O70250, Q6NSQ9
GO:0000079	regulation of cyclin-dependent protein serine/threonine kinase activity	11	1	0.0409481	2	B2RUG9, Q3U7U3
GO:0009166	nucleotide catabolic process	8	1	0.0412452	3	O35945, O70250, Q6NSQ9
GO:0051852	disruption by host of symbiont cells	6	1	0.0414455	1	H7BX99
GO:0000244	spliceosomal tri-snRNP complex assembly	8	1	0.0414455	1	A0A0A6YW28
GO:0048712	negative regulation of astrocyte differentiation	10	1	0.0414455	1	H7BX99
GO:0070255	regulation of mucus secretion	6	1	0.0414455	1	Q99J83
GO:0051873	killing by host of symbiont cells	7	1	0.0414455	1	H7BX99
GO:0090241	negative regulation of histone H4 acetylation	12	1	0.0414455	1	Q99J83
GO:0051096	positive regulation of helicase activity	6	1	0.0414455	1	D3YZA1
GO:0019883	antigen processing and presentation of endogenous antigen	3	1	0.0414455	1	Q99J83
GO:0051969	regulation of transmission of nerve impulse	6	1	0.0414455	1	P17439
GO:0071447	cellular response to hydroperoxide	5	1	0.0414455	1	D3YU60
GO:0015866	ADP transport	9	1	0.0414455	1	A2ASZ8
GO:0046520	sphingoid biosynthetic process	8	1	0.0414455	1	P17439
GO:0070585	protein localization to mitochondrion	6	1	0.0420392	2	O88441, Q3U7U3
GO:0051291	protein heterooligomerization	6	1	0.0425889	2	A0A0N4SWB9, Q04857
GO:0007286	spermatid development	5	1	0.0425889	2	P05532, Q9D8T7
GO:0009206	purine ribonucleoside triphosphate biosynthetic process	10	1	0.0428335	3	O35945, O70250, Q6NSQ9
GO:0006566	threonine metabolic process	9	1	0.0431412	2	E9PWY6, Q8CFA2
GO:0009145	purine nucleoside triphosphate biosynthetic process	9	1	0.0431548	3	O35945, O70250, Q6NSQ9
GO:0006122	mitochondrial electron transport, ubiquinol to cytochrome c	6	1	0.0436974	1	P00015
GO:0007369	gastrulation	4	1	0.0436974	1	Q9JLV5
GO:0090130	tissue migration	2	1	0.0436974	1	P62737
GO:0010586	miRNA metabolic process	8	1	0.0436974	1	Q8CI75
GO:0001516	prostaglandin biosynthetic process	11	1	0.0436974	1	E9PXB0
GO:0051883	killing of cells in other organism involved in symbiotic interaction	6	1	0.0436974	1	H7BX99
GO:0046457	prostanoid biosynthetic process	10	1	0.0436974	1	E9PXB0
GO:0007005	mitochondrion organization	4	1	0.0439635	4	D3YWI4, Q99J83, Q9CWE0, Q9D8T7
GO:0046496	nicotinamide nucleotide metabolic process	9	1	0.044126	3	O35945, O70250, Q6NSQ9
GO:0009144	purine nucleoside triphosphate metabolic process	8	1	0.0442007	4	A2ASZ8, O35945, O70250, Q6NSQ9
GO:0055002	striated muscle cell development	5	1	0.044254	2	Q8VHX6, Q99J83
GO:0009132	nucleoside diphosphate metabolic process	7	1	0.0444521	3	O35945, O70250, Q6NSQ9
GO:0031669	cellular response to nutrient levels	5	1	0.0447795	3	P17439, Q8BRK8, Q99J83
GO:0006563	L-serine metabolic process	9	1	0.0448144	2	E9PWY6, Q8CFA2
GO:0009199	ribonucleoside triphosphate metabolic process	8	1	0.045398	4	A2ASZ8, O35945, O70250, Q6NSQ9
GO:0071900	regulation of protein serine/threonine kinase activity	10	1	0.0455901	5	A0A0A6YXS7, B2RUG9, P05532, P17439, Q3U7U3
GO:0006670	sphingosine metabolic process	8	1	0.0459441	1	P17439
GO:0034058	endosomal vesicle fusion	7	1	0.0459441	1	Q5KU39
GO:0043383	negative T cell selection	3	1	0.0459441	1	Q99J83
GO:0031953	negative regulation of protein autophosphorylation	10	1	0.0459441	1	E9Q3X0
GO:0006007	glucose catabolic process	7	1	0.0459441	1	O70250
GO:0051128	regulation of cellular component organization	4	1	0.0465887	19	A0A0N4SW93, B2RUG9, D3YZA1, E9PYT3, E9Q7G0, H7BX99, O70493, P05532, P17439, P51910, P55302, Q3U7U3, Q4VBD2, Q5KU39, Q91VF2, Q99J83, Q99J95, Q9ERR1, Q9JLV5
GO:0009161	ribonucleoside monophosphate metabolic process	8	1	0.0468585	4	A2ASZ8, O35945, O70250, Q6NSQ9
GO:0097746	regulation of blood vessel diameter	6	1	0.0470821	2	P62737, Q99J83
GO:0035296	regulation of tube diameter	5	1	0.0470821	2	P62737, Q99J83
GO:0051783	regulation of nuclear division	6	1	0.0471048	3	B2RUG9, E9Q7G0, Q9JLV5
GO:0032990	cell part morphogenesis	4	1	0.0473511	4	A2A9R6, A2AKX2, Q9D8T7, Q9ERR1
GO:1904029	regulation of cyclin-dependent protein kinase activity	10	1	0.0476555	2	B2RUG9, Q3U7U3
GO:1901292	nucleoside phosphate catabolic process	7	1	0.04778	3	O35945, O70250, Q6NSQ9
GO:0038093	Fc receptor signaling pathway	7	1	0.0481855	1	P05532
GO:0070816	phosphorylation of RNA polymerase II C-terminal domain	11	1	0.0481855	1	Q99J95
GO:0046479	glycosphingolipid catabolic process	8	1	0.0481855	1	P17439
GO:0031340	positive regulation of vesicle fusion	7	1	0.0481855	1	A0A0N4SW93
GO:0075509	endocytosis involved in viral entry into host cell	6	1	0.0481855	1	F6W2Q5
GO:0033129	positive regulation of histone phosphorylation	10	1	0.0481855	1	Q99J95
GO:0060292	long-term synaptic depression	8	1	0.0481855	1	Q14BI1
GO:0051095	regulation of helicase activity	5	1	0.0481855	1	D3YZA1
GO:0070208	protein heterotrimerization	7	1	0.0481855	1	Q04857
GO:0090235	regulation of metaphase plate congression	6	1	0.0481855	1	E9Q7G0
GO:0048208	COPII vesicle coating	6	1	0.0481855	1	Q9JLV5
GO:0019377	glycolipid catabolic process	7	1	0.0481855	1	P17439
GO:0043455	regulation of secondary metabolic process	4	1	0.0481855	1	O70250
GO:0010507	negative regulation of autophagy	7	1	0.04881	2	E9PZP8, P60853
GO:0006631	fatty acid metabolic process	7	1	0.0493504	4	E9PXB0, Q07417, Q5ICG5, Q91WC9
GO:1901987	regulation of cell cycle phase transition	6	1	0.0493504	4	A0A0A6YXS7, B2RUG9, Q3U7U3, Q9JLV5
GO:0051234	establishment of localization	2	1	0.0497375	25	A0A0J9YU87, A0A0N4SW93, A2AIR7, A2ASZ8, D3YZA1, E9PXB0, F6W2Q5, O88441, P05532, P35283, P51910, P55302, Q14BI1, Q3TMH2, Q3TWN3, Q3U7U3, Q5KU39, Q6NSQ9, Q7TNF0, Q8CHU3, Q8R1B5, Q9DB41, Q9ERR1, Q9JLV5, Q9QXK3
GO:0009201	ribonucleoside triphosphate biosynthetic process	9	1	0.049834	3	O35945, O70250, Q6NSQ9
GO:0002573	myeloid leukocyte differentiation	5	1	0.0499747	2	A2AIH8, P05532

## Sheet: MOLECULAR_FUNCTION
GO.ID	GO.Name	Level	FDR	P.Value	Nr.Test	IDs
GO:0005509	calcium ion binding	5	0.893434	0.000754887	12	A0A0N4SW93, A2AIR7, A2ASZ8, F6W2Q5, H7BX99, P51432, Q14BI1, Q61282, Q7TNF0, Q91V77, Q91WG7, Q9CQ19
GO:0042802	identical protein binding	3	0.893434	0.00077914	19	A0A0A6YW28, A0A0N4SWB9, B2RUG9, D3YY09, E9PVU9, E9PYN1, E9PYT3, E9Q3X0, F6W2Q5, P05532, Q5ICG5, Q5KU39, Q80X90, Q91V77, Q99LC8, Q9DC33, Q9ERR1, Q9JLV5, Q9Z1J3
GO:0097322	7SK snRNA binding	6	0.893434	0.000816574	2	Q99J95, Q9JIK5
GO:0004047	aminomethyltransferase activity	5	0.893434	0.00234846	1	Q8CFA2
GO:0005020	stem cell factor receptor activity	8	0.893434	0.00234846	1	P05532
GO:0046539	histamine N-methyltransferase activity	6	0.893434	0.00234846	1	Q91VF2
GO:0045155	electron transporter, transferring electrons from CoQH2-cytochrome c reductase complex and cytochrome c oxidase complex activity	4	0.973191	0.00469144	1	P00015
GO:0008127	quercetin 2,3-dioxygenase activity	5	0.973191	0.00469144	1	A2AIH8
GO:0008017	microtubule binding	5	1	0.00515739	6	B2RUG9, E9Q7G0, P60853, P70122, Q5KU39, Q9ERR1
GO:0051010	microtubule plus-end binding	6	1	0.00574967	2	B2RUG9, E9Q7G0
GO:0019776	Atg8 ligase activity	3	1	0.00702897	1	Q99J83
GO:0050309	sugar-terminal-phosphatase activity	8	1	0.00702897	1	Q6NSQ9
GO:0008890	glycine C-acetyltransferase activity	7	1	0.00702897	1	E9PWY6
GO:0004346	glucose-6-phosphatase activity	9	1	0.00702897	1	Q6NSQ9
GO:0070840	dynein complex binding	3	1	0.00775439	2	B2RUG9, E9Q7G0
GO:0005539	glycosaminoglycan binding	3	1	0.00847799	4	H7BX99, P28653, P55302, Q61282
GO:0018479	benzaldehyde dehydrogenase (NAD+) activity	6	1	0.00936106	1	O35945
GO:0004679	AMP-activated protein kinase activity	7	1	0.0116877	1	Q8BRK8
GO:0070053	thrombospondin receptor activity	3	1	0.0116877	1	H7BX99
GO:0031208	POZ domain binding	4	1	0.0116877	1	Q9JLV5
GO:0004910	interleukin-1, type II, blocking receptor activity	6	1	0.0140089	1	B1ASU0
GO:0047710	bis(5'-adenosyl)-triphosphatase activity	7	1	0.0140089	1	E9PVU9
GO:0046538	2,3-bisphosphoglycerate-dependent phosphoglycerate mutase activity	6	1	0.0140089	1	O70250
GO:0031071	cysteine desulfurase activity	5	1	0.0140089	1	Q9Z1J3
GO:0031685	adenosine receptor binding	5	1	0.0140089	1	A0A0A6YW28
GO:0004348	glucosylceramidase activity	5	1	0.0140089	1	P17439
GO:0005343	organic acid:sodium symporter activity	9	1	0.015705	2	A0A0J9YU87, Q9DB41
GO:0004082	bisphosphoglycerate mutase activity	5	1	0.0163248	1	O70250
GO:0004169	dolichyl-phosphate-mannose-protein mannosyltransferase activity	6	1	0.0163248	1	Q9ESP1
GO:1990430	extracellular matrix protein binding	3	1	0.0163248	1	Q0VBD0
GO:0004619	phosphoglycerate mutase activity	5	1	0.0163248	1	O70250
GO:0070330	aromatase activity	5	1	0.0163248	1	Q9JKY7
GO:0030332	cyclin binding	3	1	0.0175826	2	Q99J95, Q9JLV5
GO:0015631	tubulin binding	4	1	0.0182404	6	B2RUG9, E9Q7G0, P60853, P70122, Q5KU39, Q9ERR1
GO:0016453	C-acetyltransferase activity	6	1	0.0186352	1	E9PWY6
GO:0017069	snRNA binding	5	1	0.0203622	2	Q99J95, Q9JIK5
GO:0050840	extracellular matrix binding	2	1	0.0228806	2	P28653, Q9QZF2
GO:0004663	Rab geranylgeranyltransferase activity	7	1	0.0232399	1	A0A0G2JDK3
GO:0050308	sugar-phosphatase activity	7	1	0.0232399	1	Q6NSQ9
GO:0070326	very-low-density lipoprotein particle receptor binding	5	1	0.0232399	1	P55302
GO:0004661	protein geranylgeranyltransferase activity	6	1	0.0255342	1	A0A0G2JDK3
GO:0008508	bile acid:sodium symporter activity	11	1	0.0255342	1	A0A0J9YU87
GO:0019203	carbohydrate phosphatase activity	6	1	0.0255342	1	Q6NSQ9
GO:0035174	histone serine kinase activity	7	1	0.0278232	1	Q8BRK8
GO:0004439	phosphatidylinositol-4,5-bisphosphate 5-phosphatase activity	9	1	0.0278232	1	Q66GT5
GO:0004064	arylesterase activity	5	1	0.0278232	1	P13634
GO:0003824	catalytic activity	1	1	0.0288289	48	A0A0A6YW28, A0A0A6YXS7, A0A0G2JDK3, A2AIH8, A6H611, D3YU60, E9PVU9, E9PWY6, E9PXB0, E9PYT3, E9PZP8, F6SMY7, F8WIK0, H7BX99, O35945, O70250, P00015, P05532, P13634, P17439, P35283, P51432, P52760, P61080, Q07417, Q3TMH2, Q5ICG5, Q66GT5, Q6NSQ9, Q6NZR5, Q8BRK8, Q8C7E4, Q8CFA2, Q8CI75, Q8K411, Q91V76, Q91VF2, Q91WC9, Q91WG7, Q99J83, Q99J95, Q9EQ06, Q9ESP1, Q9JIK5, Q9JKY7, Q9JLV5, Q9R190, Q9Z1J3
GO:0008273	calcium, potassium:sodium antiporter activity	9	1	0.0301069	1	Q14BI1
GO:0019843	rRNA binding	5	1	0.0311483	2	P70122, Q9JIK5
GO:0043167	ion binding	2	1	0.0331675	40	A0A0N4SW93, A1L3S7, A2AIH8, A2AIR7, A2ASZ8, A6H611, E9PWY6, E9PYT3, E9Q7G0, F6W2Q5, F8WIK0, H7BX99, O70493, P00015, P05532, P13634, P35283, P51432, P55302, P61080, P62737, Q07417, Q14BI1, Q3TWN3, Q61282, Q6NZR5, Q7TNF0, Q8BRK8, Q8CI75, Q8K411, Q91V76, Q91V77, Q91WG7, Q99J95, Q9CQ19, Q9JIK5, Q9JKY7, Q9QZF2, Q9R190, Q9Z1J3
GO:0017022	myosin binding	4	1	0.0336248	2	Q8BN59, Q9CQ19
GO:0046872	metal ion binding	4	1	0.0350768	25	A0A0N4SW93, A1L3S7, A2AIH8, A2AIR7, A2ASZ8, A6H611, F6W2Q5, F8WIK0, H7BX99, P00015, P05532, P13634, P51432, Q14BI1, Q61282, Q7TNF0, Q8CI75, Q8K411, Q91V76, Q91V77, Q91WG7, Q9CQ19, Q9JKY7, Q9QZF2, Q9R190
GO:0047499	calcium-independent phospholipase A2 activity	7	1	0.0369259	1	E9PXB0
GO:0008318	protein prenyltransferase activity	5	1	0.0369259	1	A0A0G2JDK3
GO:0005544	calcium-dependent phospholipid binding	5	1	0.037741	2	A0A0N4SW93, Q7TNF0
GO:0005326	neurotransmitter transporter activity	2	1	0.0387988	2	Q8R1B5, Q9DB41
GO:0004908	interleukin-1 receptor activity	5	1	0.0391884	1	B1ASU0
GO:0004030	aldehyde dehydrogenase [NAD(P)+] activity	5	1	0.0391884	1	O35945
GO:0030170	pyridoxal phosphate binding	5	1	0.0404066	2	E9PWY6, Q9Z1J3
GO:0070279	vitamin B6 binding	4	1	0.0404066	2	E9PWY6, Q9Z1J3
GO:0106019	phosphatidylinositol-4,5-bisphosphate phosphatase activity	8	1	0.0414455	1	Q66GT5
GO:0005347	ATP transmembrane transporter activity	7	1	0.0414455	1	A2ASZ8
GO:0015217	ADP transmembrane transporter activity	7	1	0.0414455	1	A2ASZ8
GO:0048019	receptor antagonist activity	4	1	0.0436974	1	P55302
GO:0004089	carbonate dehydratase activity	5	1	0.0481855	1	P13634
GO:0032036	myosin heavy chain binding	5	1	0.0481855	1	Q9CQ19
GO:0016805	dipeptidase activity	6	1	0.0481855	1	Q3TMH2
GO:0043169	cation binding	3	1	0.0495045	25	A0A0N4SW93, A1L3S7, A2AIH8, A2AIR7, A2ASZ8, A6H611, F6W2Q5, F8WIK0, H7BX99, P00015, P05532, P13634, P51432, Q14BI1, Q61282, Q7TNF0, Q8CI75, Q8K411, Q91V76, Q91V77, Q91WG7, Q9CQ19, Q9JKY7, Q9QZF2, Q9R190

## Sheet: CELLULAR_COMPONENT
GO.ID	GO.Name	Level	FDR	P.Value	Nr.Test	IDs
GO:0031974	membrane-enclosed lumen	1	0.0747066	2.53498e-05	8	A6H611, F8WIK0, P00015, P17439, P55302, Q8K411, Q9DBS1, Q9Z1J3
GO:0043233	organelle lumen	2	0.0747066	2.53498e-05	8	A6H611, F8WIK0, P00015, P17439, P55302, Q8K411, Q9DBS1, Q9Z1J3
GO:0070013	intracellular organelle lumen	3	0.0747066	2.53498e-05	8	A6H611, F8WIK0, P00015, P17439, P55302, Q8K411, Q9DBS1, Q9Z1J3
GO:0044444	cytoplasmic part	3	0.0747066	2.63688e-05	59	A0A0A6YW28, A0A0G2JDK3, A0A0N4SW93, A0A0N4SWB9, A2AIH8, A2AKX2, A2ASZ8, A2BHN6, A6H611, B2RUG9, D3YWI4, D3YZA1, E9PVU9, E9PWY6, E9PXB0, E9PYT3, E9Q3X0, E9Q7G0, F6W2Q5, F8WIK0, O35945, O70250, O70493, O88441, P00015, P05532, P17439, P28653, P35283, P51910, P55302, P62737, P70122, Q3U7U3, Q5KU39, Q6NSQ9, Q6NZR5, Q7TNF0, Q80X90, Q8CHU3, Q8CI75, Q8K411, Q8R1B5, Q8VHX6, Q91V77, Q99J83, Q99J95, Q99LC8,…
GO:0030133	transport vesicle	6	0.893434	0.00114937	5	E9PYT3, P28653, Q7TNF0, Q9ERR1, Q9QXK3
GO:0070382	exocytic vesicle	7	0.893434	0.00211805	4	E9PYT3, Q7TNF0, Q9ERR1, Q9QXK3
GO:0031090	organelle membrane	2	0.973191	0.00356451	15	A0A0N4SW93, A0A0R4J0Q5, A2ASZ8, D3YWI4, E9PWY6, E9PXB0, E9Q7G0, F6W2Q5, O88441, P17439, P35283, Q5KU39, Q9DB41, Q9JLV5, Q9QXK3
GO:0044429	mitochondrial part	4	0.973191	0.00404604	10	A2ASZ8, A6H611, D3YWI4, E9PWY6, F8WIK0, O88441, P00015, Q8K411, Q9DB41, Q9Z1J3
GO:0048237	rough endoplasmic reticulum lumen	6	0.973191	0.00469144	1	P55302
GO:0043227	membrane-bounded organelle	2	0.973191	0.00471089	20	A0A0N4SWB9, E9PXB0, E9PYT3, F6W2Q5, O70493, P05532, P28653, P35283, P55302, Q3TWN3, Q5KU39, Q7TNF0, Q80X90, Q8BN59, Q8CHU3, Q91V77, Q99J83, Q9D8T7, Q9ERR1, Q9QXK3
GO:0043229	intracellular organelle	3	0.997542	0.00497966	33	A0A0N4SWB9, B2RUG9, D3YZA1, E9PXB0, E9PYT3, E9Q3X0, F6W2Q5, F8WIK0, O70493, O88441, P05532, P28653, P35283, P55302, P62737, P70122, Q3TWN3, Q5KU39, Q7TNF0, Q80X90, Q8BN59, Q8CHU3, Q8CI75, Q91V77, Q99J83, Q99J95, Q99LC8, Q9CXU9, Q9D8T7, Q9EQ06, Q9ERR1, Q9JIK5, Q9QXK3
GO:0042383	sarcolemma	3	1	0.00593432	3	P28653, Q04857, Q8VHX6
GO:0044297	cell body	2	1	0.00663112	5	A0A0R4J0Y4, A2AIR7, P51910, P62737, Q4V9Z5
GO:0099503	secretory vesicle	6	1	0.00962753	5	E9PYT3, Q7TNF0, Q9D8T7, Q9ERR1, Q9QXK3
GO:0044424	intracellular part	2	1	0.0106564	80	A0A023T778, A0A0A6YW28, A0A0A6YXS7, A0A0G2JDK3, A0A0N4SW93, A0A0N4SWB9, A0A0R4J0Q5, A1L3S7, A2AIH8, A2AKX2, A2ASZ8, A2BHN6, A6H611, B2RUG9, D3YWI4, D3YZA1, E9PVU9, E9PWY6, E9PXB0, E9PYT3, E9Q3X0, E9Q7G0, F6W2Q5, F8WIK0, H3BJ30, O35945, O70250, O70493, O88441, P00015, P05532, P13634, P17439, P28653, P35283, P51432, P51910, P55302, P60853, P61080, P62737, P70122, Q07417, Q3TWN3, Q3U7U3, Q4VBD2, Q5K…
GO:0097414	classical Lewy body	5	1	0.0116877	1	Q3U7U3
GO:1990038	Lewy body corona	3	1	0.0116877	1	Q3U7U3
GO:0097462	Lewy neurite	5	1	0.0116877	1	Q3U7U3
GO:0097409	glial cytoplasmic inclusion	4	1	0.0116877	1	Q3U7U3
GO:0060053	neurofilament cytoskeleton	7	1	0.0116877	1	Q9ERR1
GO:0043226	organelle	1	1	0.0127591	33	A0A0N4SWB9, B2RUG9, D3YZA1, E9PXB0, E9PYT3, E9Q3X0, F6W2Q5, F8WIK0, O70493, O88441, P05532, P28653, P35283, P55302, P62737, P70122, Q3TWN3, Q5KU39, Q7TNF0, Q80X90, Q8BN59, Q8CHU3, Q8CI75, Q91V77, Q99J83, Q99J95, Q99LC8, Q9CXU9, Q9D8T7, Q9EQ06, Q9ERR1, Q9JIK5, Q9QXK3
GO:0043025	neuronal cell body	3	1	0.0129308	4	A0A0R4J0Y4, A2AIR7, P51910, Q4V9Z5
GO:0005788	endoplasmic reticulum lumen	5	1	0.01392	2	P55302, Q9DBS1
GO:0061673	mitotic spindle astral microtubule	9	1	0.0140089	1	E9Q7G0
GO:0043202	lysosomal lumen	6	1	0.0140089	1	P17439
GO:0055028	cortical microtubule	8	1	0.0140089	1	E9Q7G0
GO:1905720	cytoplasmic microtubule bundle	6	1	0.0140089	1	E9Q7G0
GO:0034686	integrin alphav-beta8 complex	6	1	0.0140089	1	Q0VBD0
GO:0034274	Atg12-Atg5-Atg16 complex	4	1	0.0140089	1	Q99J83
GO:0030120	vesicle coat	5	1	0.0142695	2	Q8CHU3, Q9QXK3
GO:0005759	mitochondrial matrix	5	1	0.0145694	3	A6H611, Q8K411, Q9Z1J3
GO:0031410	cytoplasmic vesicle	5	1	0.0148696	10	E9PYT3, O70493, P28653, P35283, Q5KU39, Q7TNF0, Q80X90, Q9D8T7, Q9ERR1, Q9QXK3
GO:0097708	intracellular vesicle	4	1	0.0153666	10	E9PYT3, O70493, P28653, P35283, Q5KU39, Q7TNF0, Q80X90, Q9D8T7, Q9ERR1, Q9QXK3
GO:0055087	Ski complex	4	1	0.0163248	1	Q6NZR5
GO:0098588	bounding membrane of organelle	3	1	0.0165058	9	E9PXB0, E9Q7G0, F6W2Q5, O88441, P17439, P35283, Q5KU39, Q9JLV5, Q9QXK3
GO:0045298	tubulin complex	5	1	0.0177926	6	B2RUG9, E9Q7G0, P60853, P70122, Q5KU39, Q9ERR1
GO:0097575	lateral cell cortex	7	1	0.0186352	1	E9Q7G0
GO:0098793	presynapse	3	1	0.0196437	3	A2AIR7, Q7TNF0, Q8R1B5
GO:0030128	clathrin coat of endocytic vesicle	7	1	0.0209402	1	Q8CHU3
GO:1990037	Lewy body core	3	1	0.0209402	1	Q3U7U3
GO:0000235	astral microtubule	8	1	0.0209402	1	E9Q7G0
GO:0044433	cytoplasmic vesicle part	4	1	0.0221039	6	A0A0N4SW93, F6W2Q5, P35283, Q5KU39, Q8CHU3, Q9QXK3
GO:0030485	smooth muscle contractile fiber	6	1	0.0232399	1	P62737
GO:0031225	anchored component of membrane	3	1	0.0246272	2	A2AKX2, Q9QZF2
GO:0097413	Lewy body	4	1	0.0255342	1	Q3U7U3
GO:0005638	lamin filament	7	1	0.0255342	1	A0A0R4J0Q5
GO:0031966	mitochondrial membrane	5	1	0.0268713	5	A2ASZ8, D3YWI4, E9PWY6, O88441, Q9DB41
GO:0005743	mitochondrial inner membrane	6	1	0.0273203	4	A2ASZ8, D3YWI4, E9PWY6, Q9DB41
GO:0005775	vacuolar lumen	5	1	0.0278232	1	P17439
GO:0043203	axon hillock	5	1	0.0301069	1	Q9ERR1
GO:0005851	eukaryotic translation initiation factor 2B complex	4	1	0.0301069	1	Q99LC8
GO:0005758	mitochondrial intermembrane space	5	1	0.0301789	2	F8WIK0, P00015
GO:0030117	membrane coat	4	1	0.0301789	2	Q8CHU3, Q9QXK3
GO:0098826	endoplasmic reticulum tubular network membrane	6	1	0.0323852	1	E9PYT3
GO:0030119	AP-type membrane coat adaptor complex	4	1	0.0346364	2	F6W2Q5, Q5KU39
GO:0005776	autophagosome	6	1	0.0346364	2	P35283, Q99J83
GO:0044233	Mitochondria-associated ER Membrane	3	1	0.0346582	1	Q99J83
GO:0000346	transcription export complex	5	1	0.0346582	1	D3YZA1
GO:0005968	Rab-protein geranylgeranyltransferase complex	4	1	0.0369259	1	A0A0G2JDK3
GO:0031588	nucleotide-activated protein kinase complex	6	1	0.0369259	1	Q8BRK8
GO:0008024	cyclin/CDK positive transcription elongation factor complex	9	1	0.0369259	1	Q99J95
GO:0071439	clathrin complex	4	1	0.0369259	1	Q5KU39
GO:0019866	organelle inner membrane	3	1	0.038486	4	A2ASZ8, D3YWI4, E9PWY6, Q9DB41
GO:0005876	spindle microtubule	7	1	0.0387988	2	E9Q7G0, Q9JLV5
GO:0070469	respiratory chain	2	1	0.0391884	1	P00015
GO:0005827	polar microtubule	8	1	0.0391884	1	Q9JLV5
GO:0031970	organelle envelope lumen	4	1	0.0398679	2	F8WIK0, P00015
GO:0098805	whole membrane	2	1	0.0398727	6	E9PXB0, O88441, P17439, P35283, Q5KU39, Q99J83
GO:0031982	vesicle	3	1	0.0398763	10	E9PYT3, O70493, P28653, P35283, Q5KU39, Q7TNF0, Q80X90, Q9D8T7, Q9ERR1, Q9QXK3
GO:0044464	cell part	1	1	0.0432311	92	A0A023T778, A0A0A6YW28, A0A0A6YXS7, A0A0G2JDK3, A0A0N4SW93, A0A0N4SWB9, A0A0R4J0Q5, A0A0R4J0Y4, A1L3S7, A2AIH8, A2AIR7, A2AKX2, A2ASZ8, A2BHN6, A6H611, B1ASU0, B2RUG9, D3YWI4, D3YZA1, E9PVU9, E9PWY6, E9PXB0, E9PYN1, E9PYT3, E9Q3X0, E9Q7G0, F6W2Q5, F8WIK0, H3BJ30, H7BX99, O35945, O70250, O70493, O88441, P00015, P01898, P05532, P13634, P17439, P28653, P35283, P51432, P51910, P55302, P60853, P61080,…
GO:0042629	mast cell granule	8	1	0.0436974	1	P05532
GO:0030123	AP-3 adaptor complex	5	1	0.0459441	1	Q5KU39
GO:0033263	CORVET complex	6	1	0.0459441	1	Q5KU39
GO:0042382	paraspeckles	7	1	0.0459441	1	H3BJ30
GO:0034663	endoplasmic reticulum chaperone complex	5	1	0.0459441	1	Q9ESP1
