# Supplementary material for: Scutellarin acts on the AR-NOX Axis to Remediate Oxidative Stress Injury in a Mouse Model of Cerebral Ischemia/Reperfusion Injury
Source: Research Square preprint supplement (doi:10.21203/rs.3.rs-471790/v1), 2021-05-07
Supplement: Supplementary file 2 [file 8335fabdf9dd56b0e8dacbb8.xlsx]

## Sheet: BIOLOGICAL_PROCESS
GO.ID

## Sheet: MOLECULAR_FUNCTION
GO.ID

## Sheet: CELLULAR_COMPONENT
GO.ID
